# Supplementary material
Source: PubMed Central journal article supplement (PMC5549943)
Supplement: NIHMS886096-supplement-supp_info_1.pdf [file NIHMS886096-supplement-supp_info_1.pdf]

## Supporting Information

### Nanofluidic Devices with 8 Pores in Series for Real-Time, Resistive-Pulse Analysis of Hepatitis B Virus Capsid Assembly

Panagiotis Kondylis,<sup>1</sup> Jinsheng Zhou,<sup>1</sup> Zachary D. Harms,<sup>1</sup> Andrew R. Kneller,<sup>1</sup> Lye Siang Lee,<sup>2</sup> Adam Zlotnick,<sup>2</sup> and Stephen C. Jacobson<sup>1</sup>

<sup>1</sup>Department of Chemistry and <sup>2</sup>Department of Molecular and Cellular Biochemistry, Indiana University, Bloomington, IN 47405

E-mail: [jacobson@indiana.edu](mailto:jacobson@indiana.edu).

#### Contents:

**Figure S1.** Reducing SDS-PAGE of Cp149 and TEM image of virus capsids assembled from Cp149 dimer.

**Figure S2.** Pulse sequences from the translocation of single  $T = 4$  capsids through the same 8-pore device.

**Figure S3.** Pulse sequences from the translocation of single  $T = 4$  capsids through 2-pore and 4-pore devices.

**Figure S4.** Histogram of number of dimers from a 1:1 mixture of  $T = 3$  and  $T = 4$  HBV capsids measured on an 8-pore device.

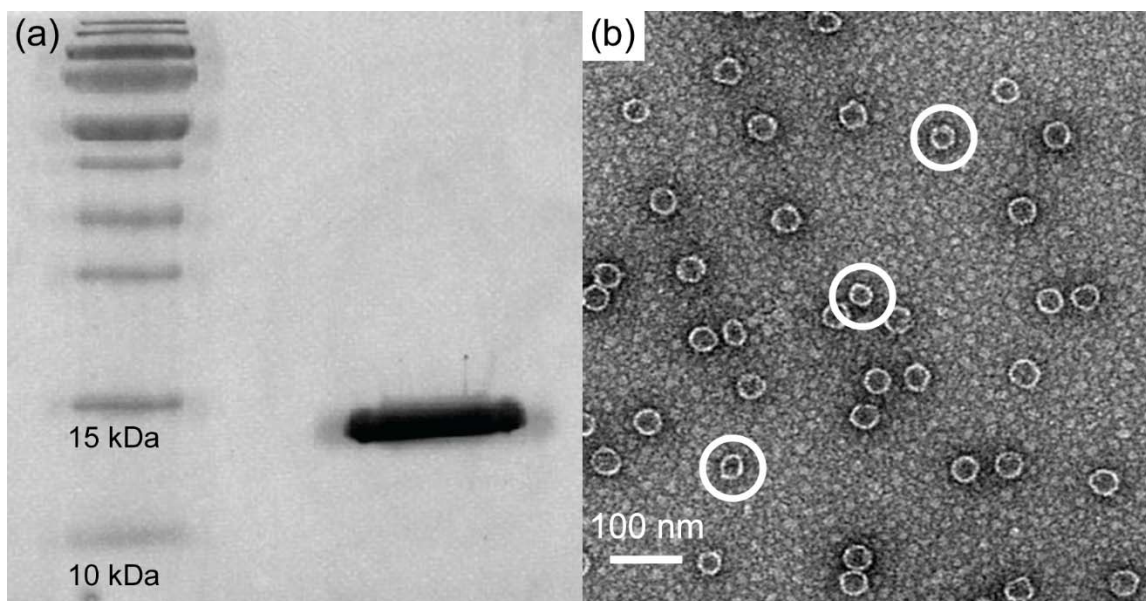

**Figure S1.** (a) Reducing SDS-PAGE of 6  $\mu\text{g}$  of Cp149, which runs as a 17 kDa monomer under reducing conditions. The single band shows the purity of the monomer. The size standard is the PageRuler Prestained Protein Ladder (Thermo-Fisher). (b) Negative-stained transmission electron microscope (TEM) image of virus capsids assembled from 5  $\mu\text{M}$  Cp149 dimer in 50 mM HEPES with 1 M NaCl. The HBV capsids were stained with 2% uranyl acetate. The primary assembly products are T = 4 capsids, but smaller T = 3 capsids are clearly observed and indicated with white circles.

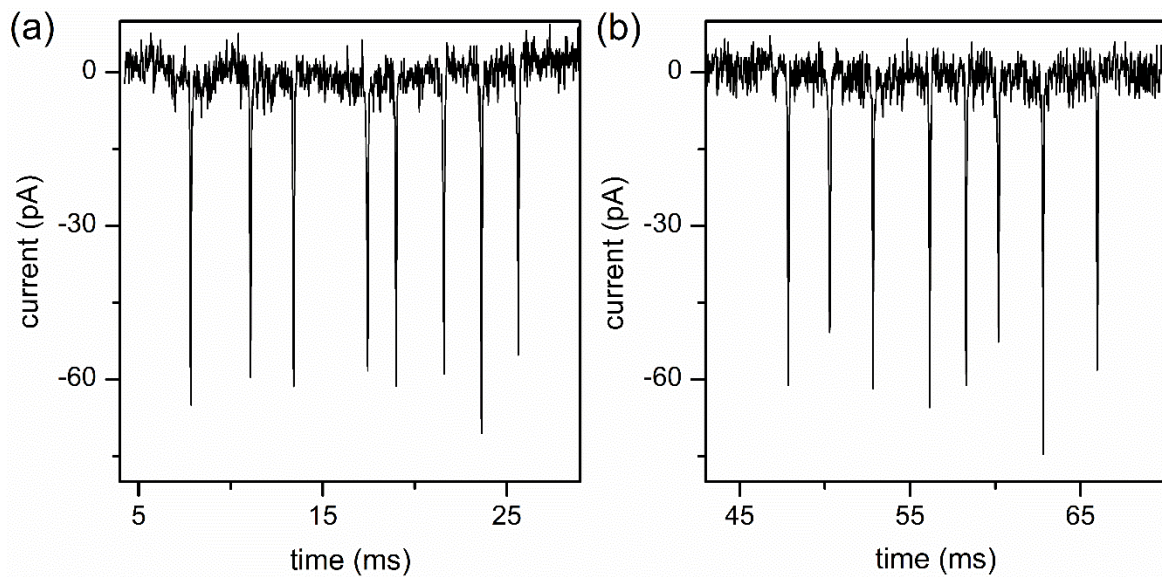

**Figure S2.** (a)-(b) Pulse sequences from the translocation of single  $T = 4$  capsids through the same 8-pore device. The baseline current ( $\sim 17$  nA) has been subtracted from the signal.

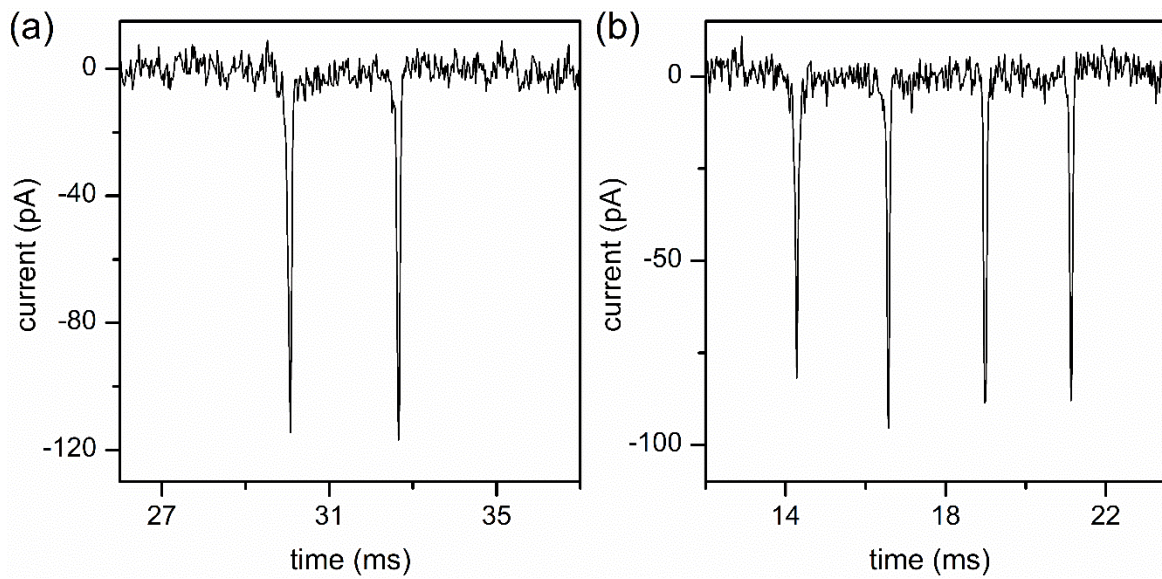

**Figure S3.** Pulse sequences from the translocation of single  $T = 4$  capsids through (a) 2-pore and (b) 4-pore devices. The baseline current ( $\sim 17$  nA) has been subtracted from the signal.

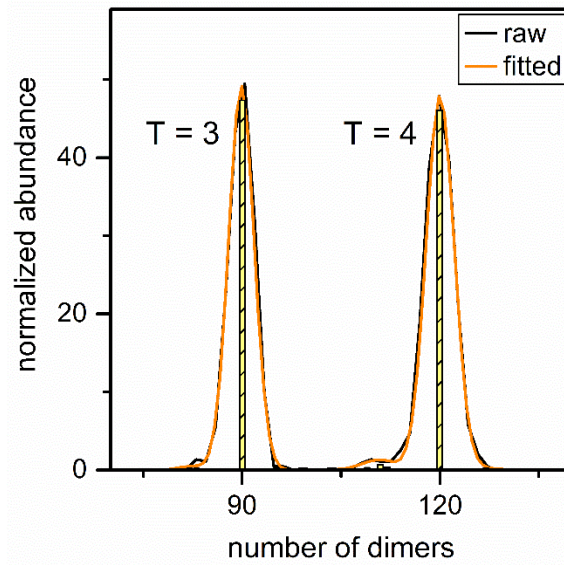

**Figure S4.** Histogram of number of dimers from a 1:1 mixture of T = 3 and T = 4 HBV capsids measured on an 8-pore device. The raw data (black line) and corresponding fitted curve (orange line) are overlaid. Yellow bars represent the means and amplitudes of the fitted Gaussian distributions. Both the T = 3 and T = 4 capsid distributions were fitted as single distributions.
